# Supplementary material for: Sphingosine 1-phosphate lyase ablation disrupts presynaptic architecture and function via an ubiquitin- proteasome mediated mechanism
Source: Sci Rep. 2016 Nov 24;6:37064. doi: 10.1038/srep37064 (PMC5121647; doi:10.1038/srep37064)
Supplement: Supplementary Figures [file srep37064-s1.pdf]

# **Sphingosine 1-phosphate lyase ablation disrupts presynaptic architecture and function via an ubiquitin- proteasome mediated mechanism**

Daniel N Mitroi<sup>1\*</sup>, André Deutschmann<sup>2\*</sup>, Maren Raucamp<sup>2</sup>, Indulekha Karunakaran<sup>1</sup>, Konstantine Glebov<sup>3</sup>, Michael Hans<sup>2</sup>, Jochen Walter<sup>3</sup>, Julie Saba<sup>4</sup>, Markus Gräler<sup>5</sup>, Dan Ehninger<sup>6</sup>, Elena Sopova<sup>7</sup>, Oleg Shupliakov<sup>7,8</sup>, Dieter Swandulla<sup>2</sup>, Gerhild van Echten-Deckert<sup>1\*\*</sup>

<sup>1</sup>LIMES Institute, Membrane Biology & Lipid Biochemistry, University of Bonn, Bonn, Germany; <sup>2</sup>Institute of Physiology, University of Bonn, Bonn Germany; <sup>3</sup>Department of Neurology, Molecular Cell Biology Unit, University of Bonn, Bonn Germany; <sup>4</sup>Children's Hospital Oakland Research Institute, University of California, San Francisco, USA;

<sup>5</sup>Department of Anaesthesiology and Intensive Care Medicine, Center for Sepsis Control and Care (CSCC), and the Center for Molecular Biomedicine (CMB), University Hospital Jena, Jena, Germany; <sup>6</sup>German Centre for Neurodegenerative Diseases (DZNE), Bonn, Germany;

<sup>7</sup>Department of Neuroscience, Karolinska Institutet, 171 77 Stockholm, Sweden; <sup>8</sup>Institute of Translational Biomedicine, St. Petersburg State University, 199034 St. Petersburg, Russia.

\*equal contribution, \*\*corresponding author.

Address correspondence to: Gerhild van Echten-Deckert, Kekulé-Institut, Gerhard-Domagk-Str. 1, 53121 Bonn, Germany; phone: +49228732703; fax: +49228734845;  
e-mail: g.echten.deckert@uni-bonn.de

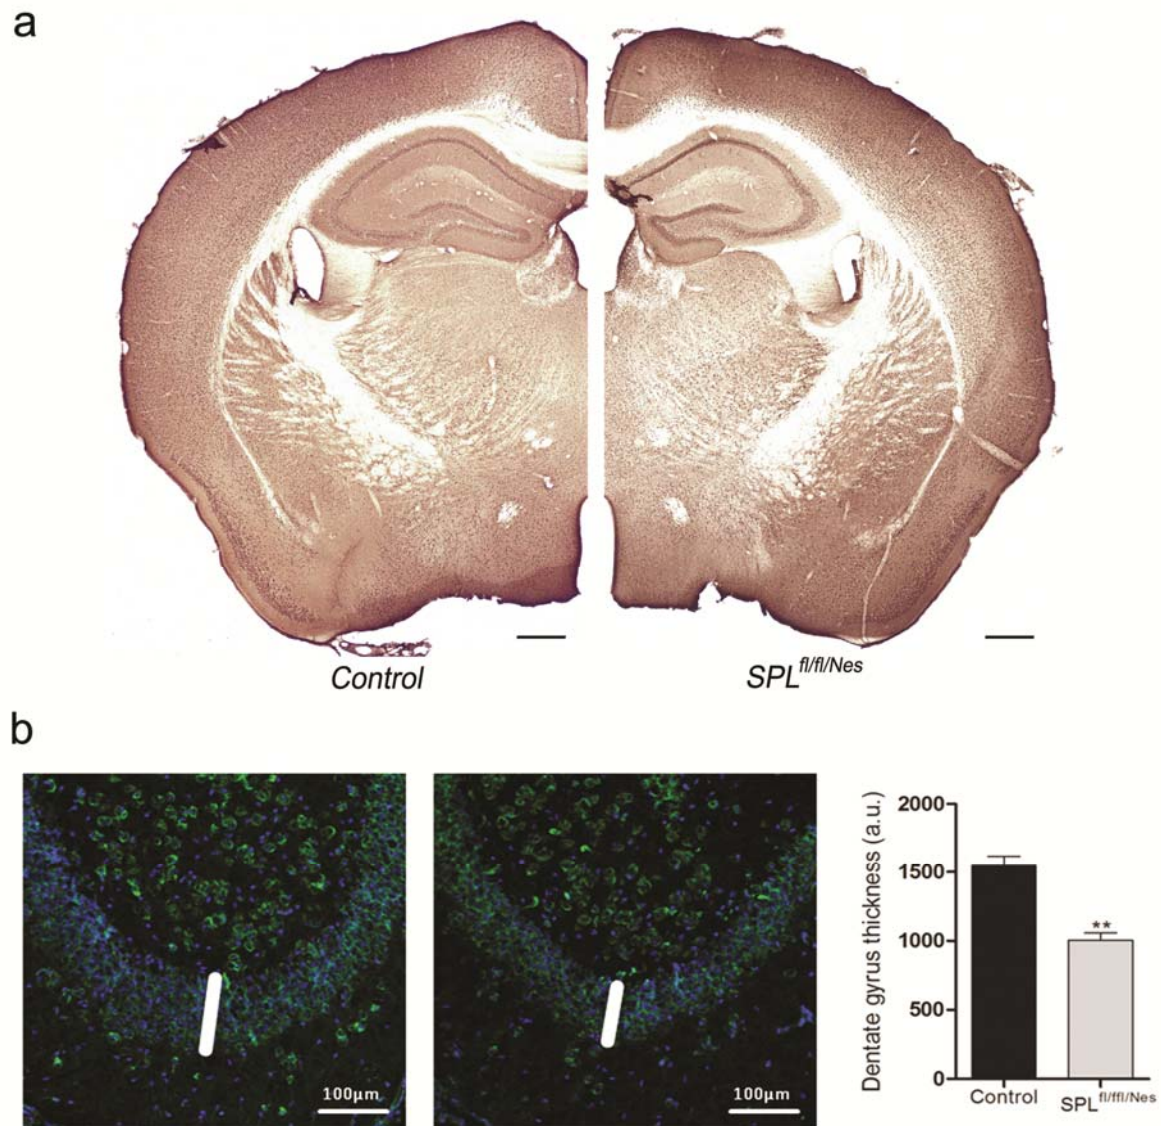

**Suppl. Figure 1. The impact of SPL ablation on brain morphology.** (a) Neuron-specific nuclear protein (NeuN) immunohistochemistry of coronal brain sections from 18-month-old control and SPL<sup>fl/fl/Nes</sup> mice (4 animals per group). Scale bar, 500  $\mu$ m. (b) Dentate gyrus from 6-month-old control and SPL<sup>fl/fl/Nes</sup> mice (3 animals per group) stained with DAPI (blue) and Nissl (green) (unpaired t test,  $P = 0.0014$ ).

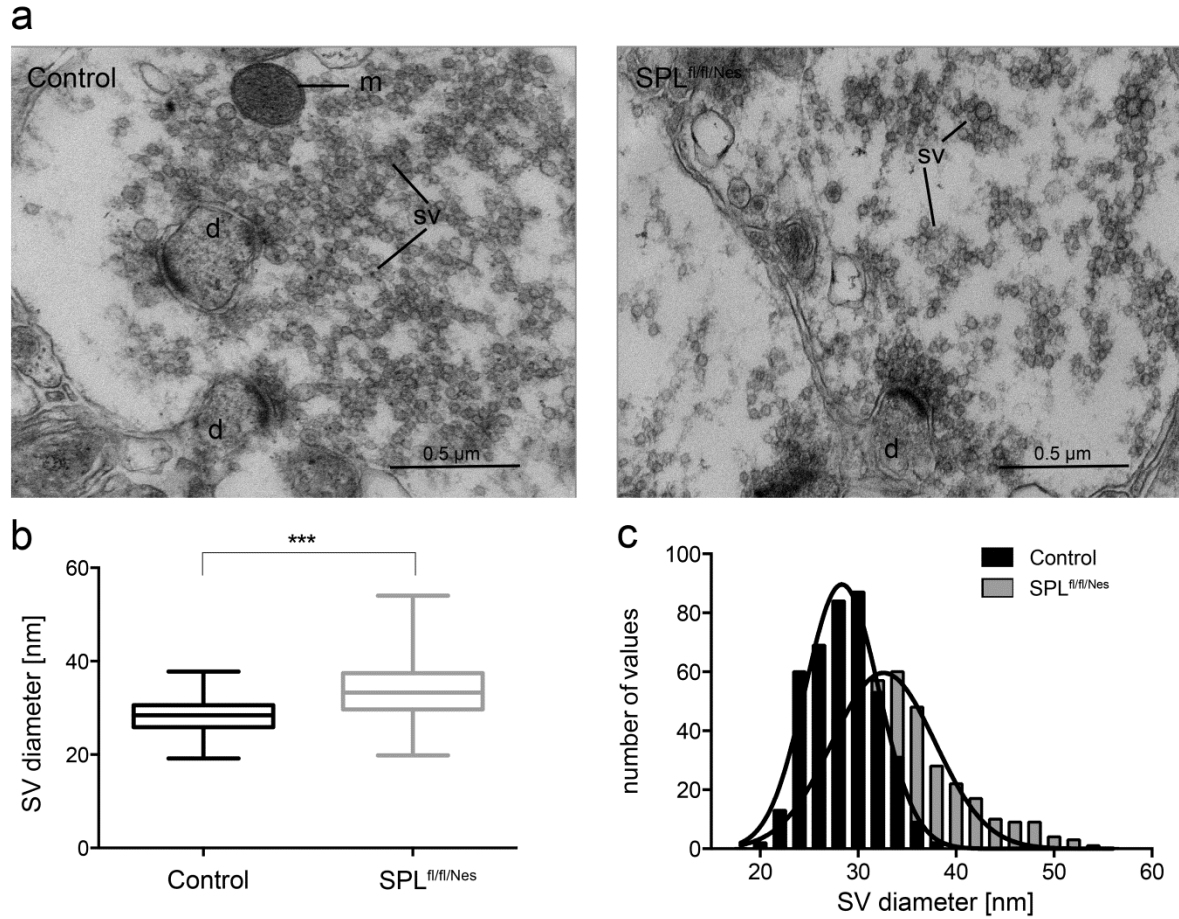

**Suppl. Figure 2. Subcellular morphology of giant mossy fiber terminals from CA3 region of murine hippocampus following ablation of SPL.** (a) EM images of giant mossy fiber boutons from a control and from an SPL<sup>fl/fl/Nes</sup> hippocampi. (b) box and whisker plot illustrating difference in Sv diameters from CA3 giant terminals (n= 410; \*\*\*p<0.0001, Student's t-test). (c) frequency distribution of Sv diameters from the same group of nerve terminals. Sv, synaptic vesicles, d, dendritic spines, m, mitochondrion. Thick arrows indicate synaptic contacts.

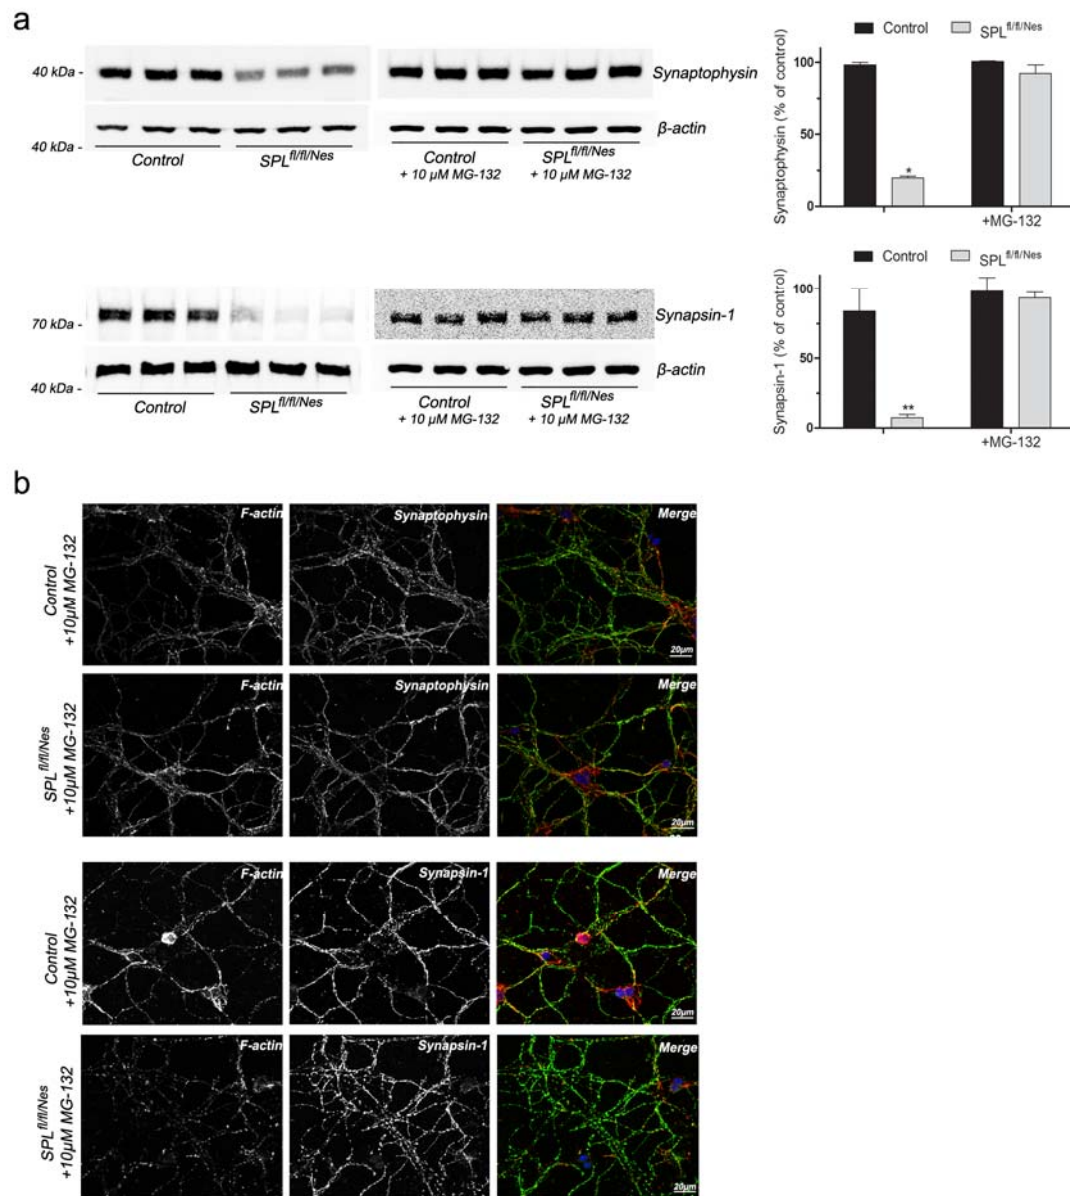

**Suppl. Figure 3. Restoration of pre-synaptic protein expression.** Neuronal cultures generated from cerebella of mice with the indicated genotype were incubated at day 14 in culture with the proteasomal inhibitor MG-132 (10  $\mu$ M, 24 h, Enzo Life Sciences, Loerrach, Germany). Then cells were harvested and pre-synaptic proteins assessed by (a) immunoblotting (two-way ANOVA,  $P_{\text{Synaptophysin}} = 0.012$ ,  $P_{\text{Synapsin-1}} = 0.0095$ ) and (b) immunostaining. F-actin (red), synaptophysin and synapsin-1 (green).

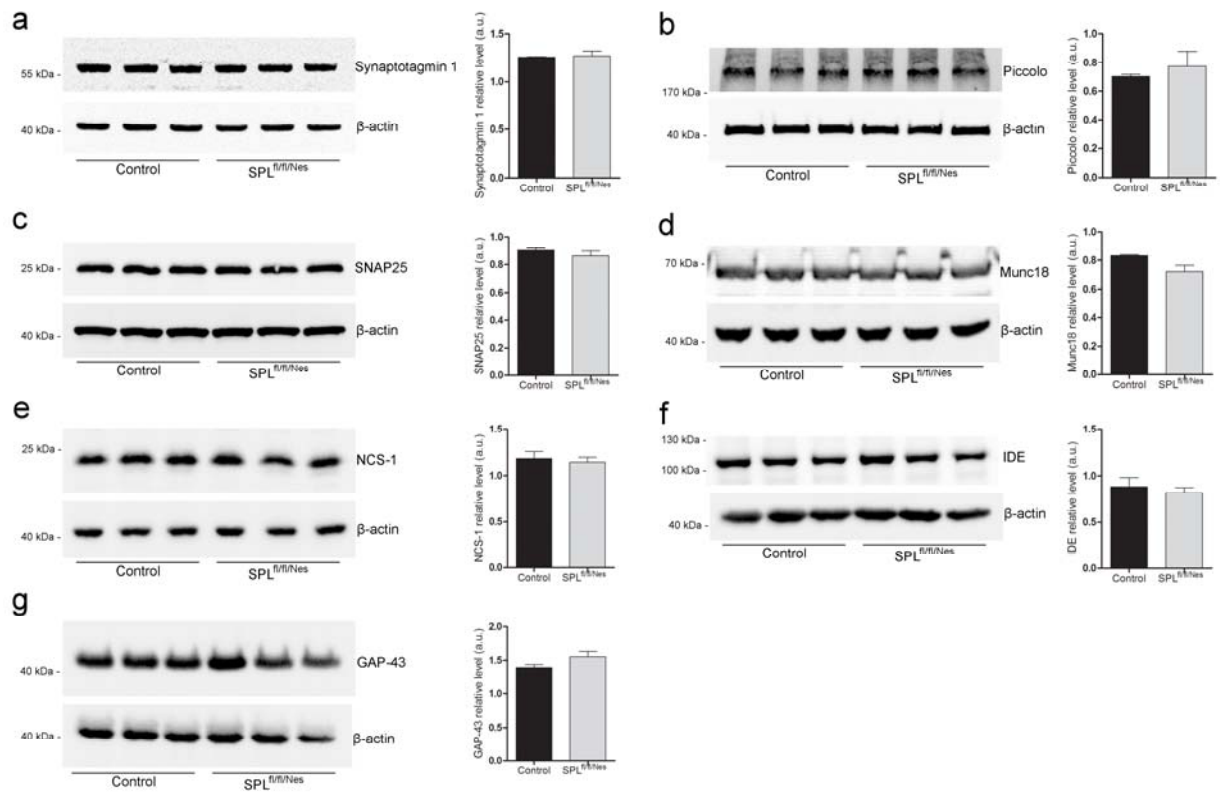

**Suppl. Figure 4. Proteins with unchanged expression in  $SPL^{fl/fl/Nes}$  mice. (a – g) Protein amounts were assessed by immunoblotting.**
